# Supplementary material for: Glyoxal's impact on dry ammonium salts: fast and reversible surface aerosol browning
Source: Copernicus journal article supplement (doi:10.5194/acp-2020-203), 2020-03-16
Supplement: Supplementary file 1 [file acp-2020-203-supplement.pdf]

# Glyoxal's impact on dry ammonium salts: fast and reversible surface aerosol browning

## Supplemental Information

*David O. De Haan,\*<sup>1</sup> Lelia N. Hawkins,<sup>2</sup> Kevin Jansen,<sup>3</sup> Hannah G. Welsh,<sup>2</sup> Raunak Pednekar,<sup>2,5</sup> Alexia de Loera,<sup>1</sup> Natalie G. Jimenez,<sup>1</sup> Margaret A. Tolbert,<sup>3</sup> Mathieu Cazaunau,<sup>4</sup> Aline Gratien,<sup>4</sup> Antonin Bergé,<sup>4</sup> Edouard Pangui,<sup>4</sup> Paola Formenti,<sup>4</sup> Jean-François Doussin<sup>4</sup>*

<sup>1</sup>Department of Chemistry and Biochemistry, University of San Diego, 5998 Alcala Park, San Diego CA 92110 USA

<sup>2</sup>Department of Chemistry, Harvey Mudd College, 301 Platt Blvd, Claremont CA 91711 USA ...

<sup>3</sup>Department of Chemistry / Cooperative Institute for Research in Environmental Sciences, University of Colorado, Boulder, CO 80309 USA

<sup>4</sup>Laboratoire Interuniversitaire des Systèmes Atmosphériques (LISA), UMR7583, CNRS, Université Paris-Est-Créteil (UPEC) et Université Paris Diderot (UPD), Institut Pierre Simon Laplace (IPSL), Créteil, France

<sup>5</sup>Deceased

\*Corresponding\_Author, [ddehaan@sandiego.edu](mailto:ddehaan@sandiego.edu)

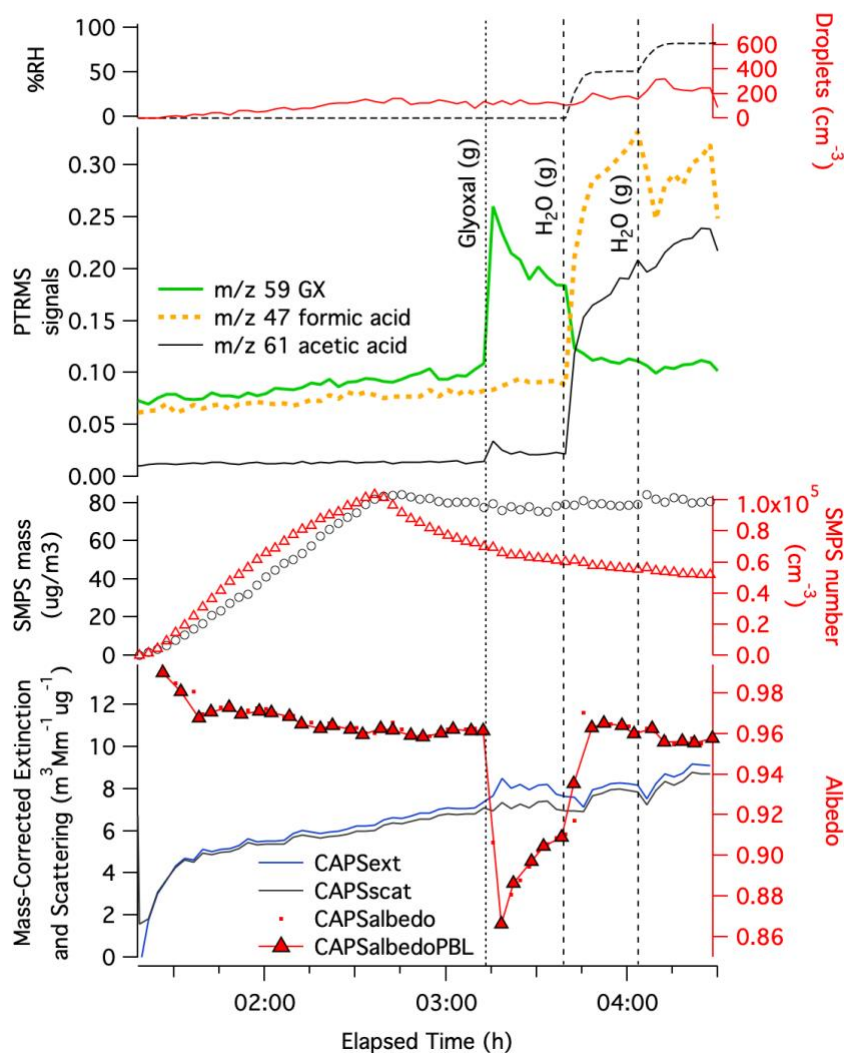

**Figure S1:** Ammonium sulfate / glycine seed experiment 2. Top: chamber RH and cloud droplet counts, traces color-coded to axes. Middle top: dilution- and water-corrected PTR-MS traces are shown for gas-phase glyoxal ( $m/z = 59$ , green line), formic acid ( $m/z 47$ , yellow dotted line), and acetic acid ( $m/z 61$ , black line). Middle bottom: dilution-corrected SMPS number density and particulate mass (assuming aerosol density = 1) are shown next, with increasing number density indicating internally-mixed AS/glycine aerosol addition at start of experiment. Bottom: mass-normalized 2-min averaged CAPS extinction (blue line), scattering (black line), single-scattering albedo (red dots), and albedo values calculated from data immediately following instrument baseline (red triangles), all measured at 450 nm. Additions of 0.25 ppm glyoxal gas (vertical dotted line), water vapor addition and 2 cloud events (dashed lines), and start of chamber illumination (red line) are labeled.

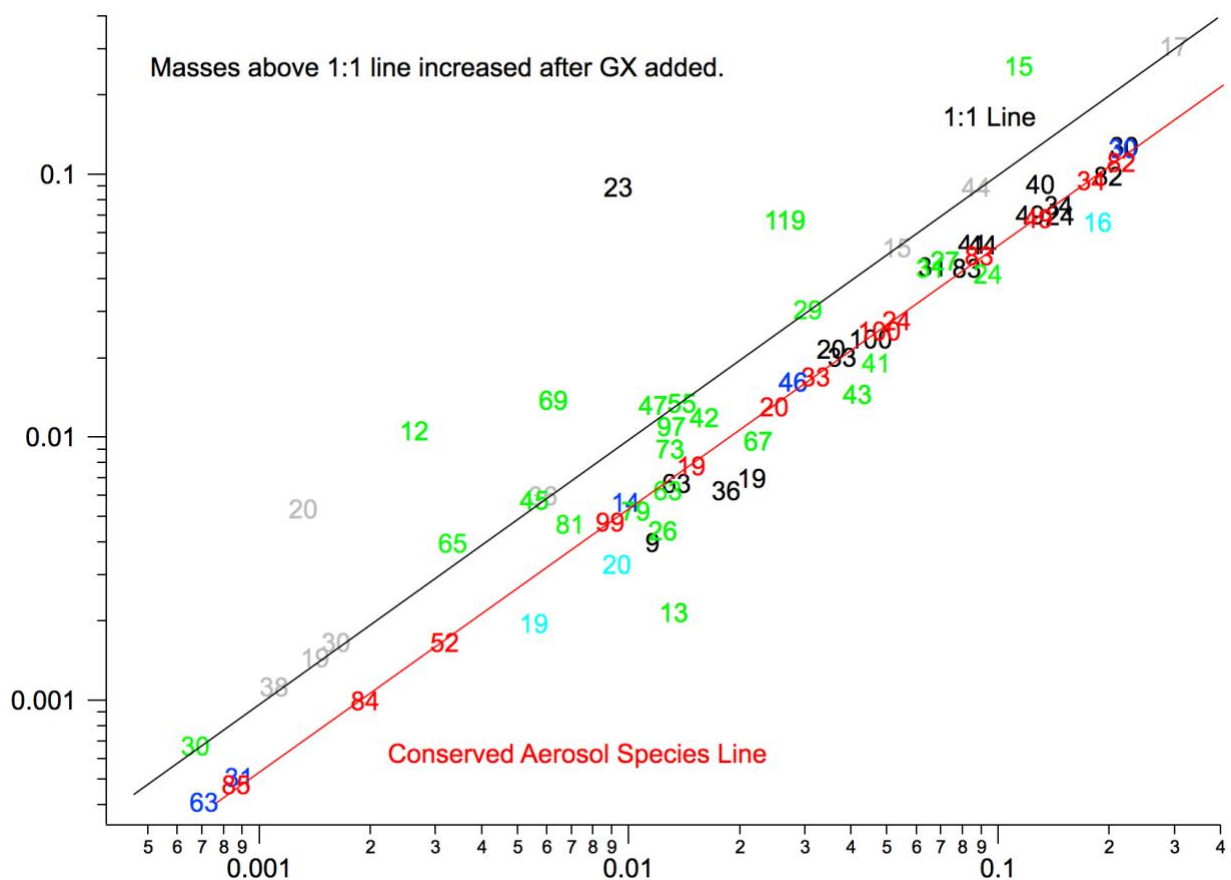

**Figure S2:** Experiment 3 AMS data summary: dry AS aerosol + 40 ppb glyoxal gas. Overall, aerosol concentrations decreased due to wall losses during the experiment, resulting in ions corresponding to conserved aerosol species falling on the red line with a slope of 1, slightly below the 1:1 line. However, certain ions increased upon GX addition and appear above the 1:1 line:  $m/z$  15 ( $\text{CH}_3$  or  $\text{NH}$  fragment),  $m/z$  23 (Na),  $m/z$  119 (imidazole carboxaldehyde, sodium adduct 97+22),  $m/z$  69 (imidazole), and  $m/z$  47 (formic acid). Ions associated with water (shown in light blue at  $m/z$  16, 19, and 20) declined slightly upon glyoxal addition, appearing below the red line.

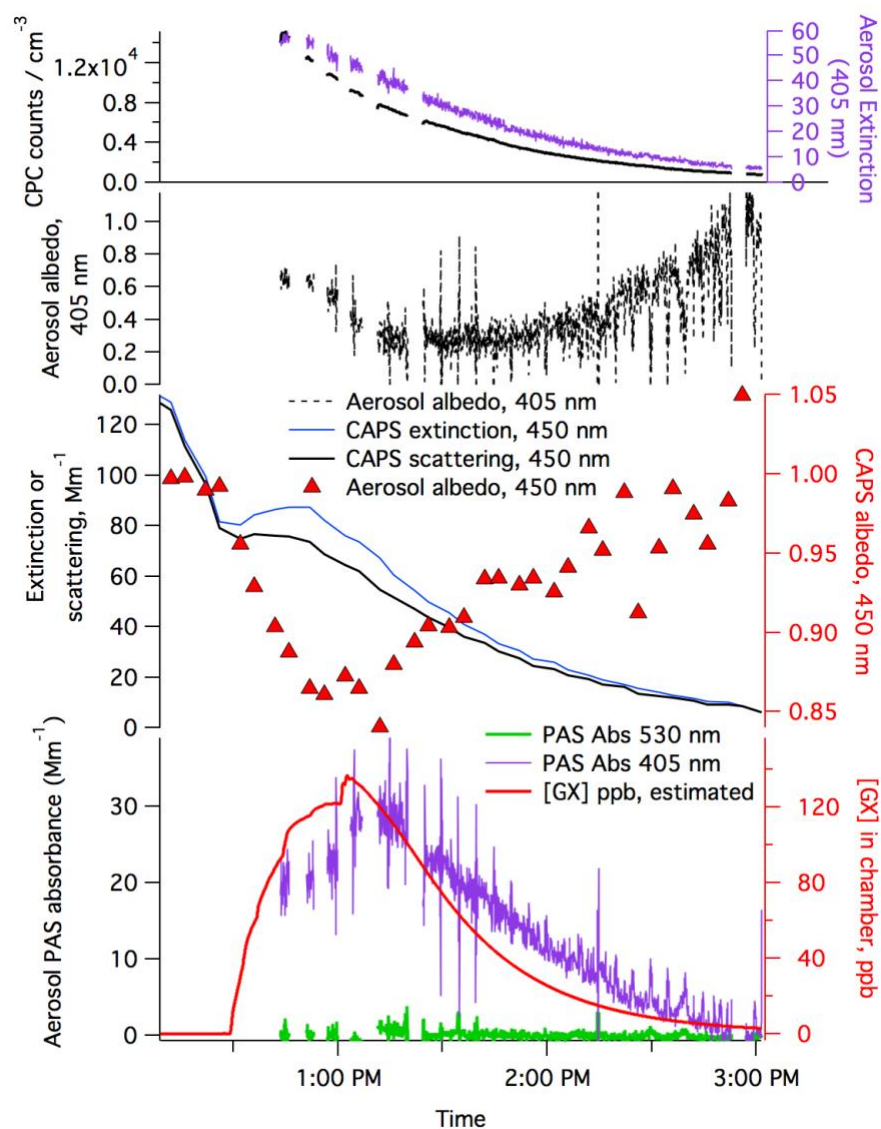

**Figure S3:** Gradual glyoxal addition experiment 8 on dry MeAS aerosol in small Tedlar chamber.

Top: Aerosol CPC counts (black) and CRD extinction at 405 nm (blue). 2<sup>nd</sup> panel: Aerosol albedo at 405 nm (black dashed line), calculated from PAS and CRD data. 3<sup>rd</sup> panel: aerosol extinction (blue), scattering (black), and albedo (red triangles), all measured at 450 nm by CAPS-ssa. Bottom: Aerosol absorbance measured by PAS at 405 nm (blue) and 530 nm (green), and estimated glyoxal concentrations in the chamber (red, calculated using wall loss rate =  $6.7 \times 10^{-4}$  s<sup>-1</sup>). Right axes are color-coded.

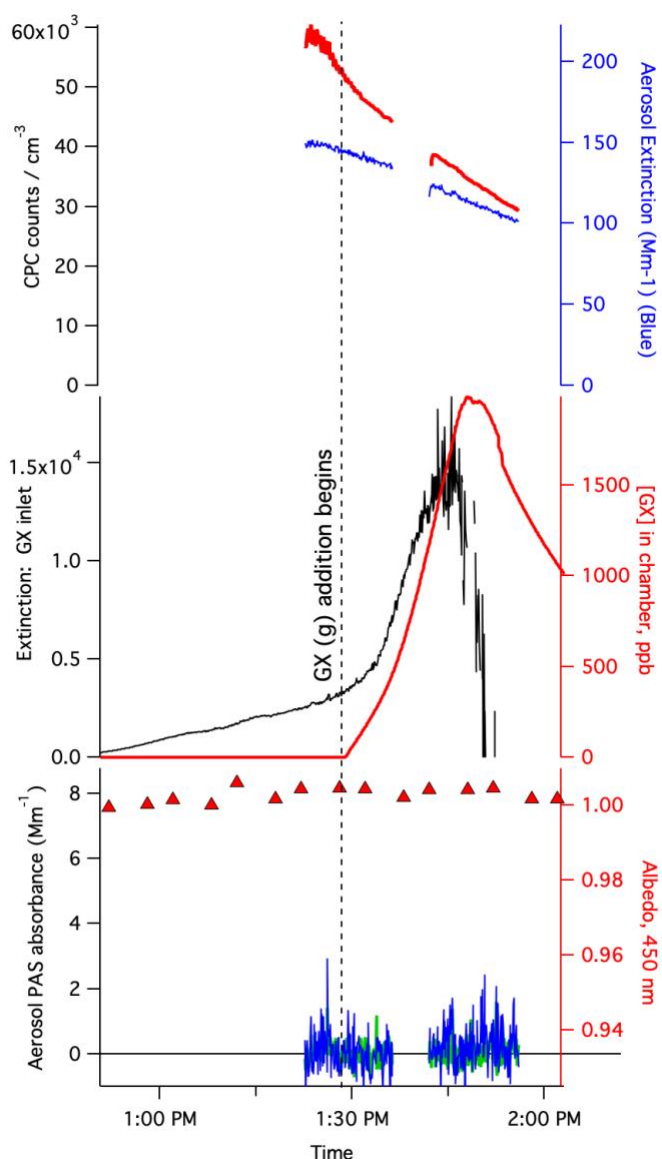

**Figure S4:** Gradual glyoxal addition experiment 9 on dry sodium sulfate ( $\text{Na}_2\text{SO}_4$ ) aerosol in small Tedlar chamber. Top: Aerosol CPC counts (red) and CRD extinction at 405 nm (blue). Middle: CRD extinction at 405 nm due to glyoxal, measured at glyoxal inlet (black), and estimated glyoxal concentrations in the chamber (red, calculated using wall loss rate =  $6.7 \times 10^{-4} \text{ s}^{-1}$ ). These chamber concentrations (and the glyoxal wall loss rate) were confirmed by measuring glyoxal concentrations by CRD extinction at 405 nm at the chamber outlet at 3 pm. Bottom: CAPS-ssa albedo at 450 nm (red triangles), and aerosol absorbance measured by PAS at 405 nm (blue) and 530 nm (green).

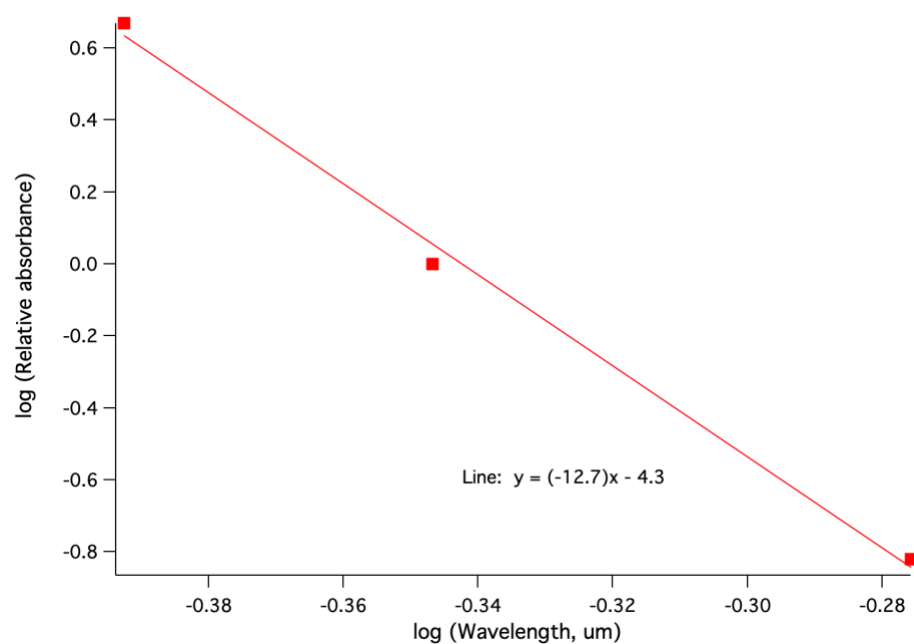

**Figure S5:** Calculation of angstrom absorption coefficient from normalized aerosol optical data recorded at 405, 450, and 530 nm at 1:11 pm in experiment 8 (140 ppb glyoxal + dry methylammonium sulfate aerosol). Slope of line is Ångstrom absorption coefficient.

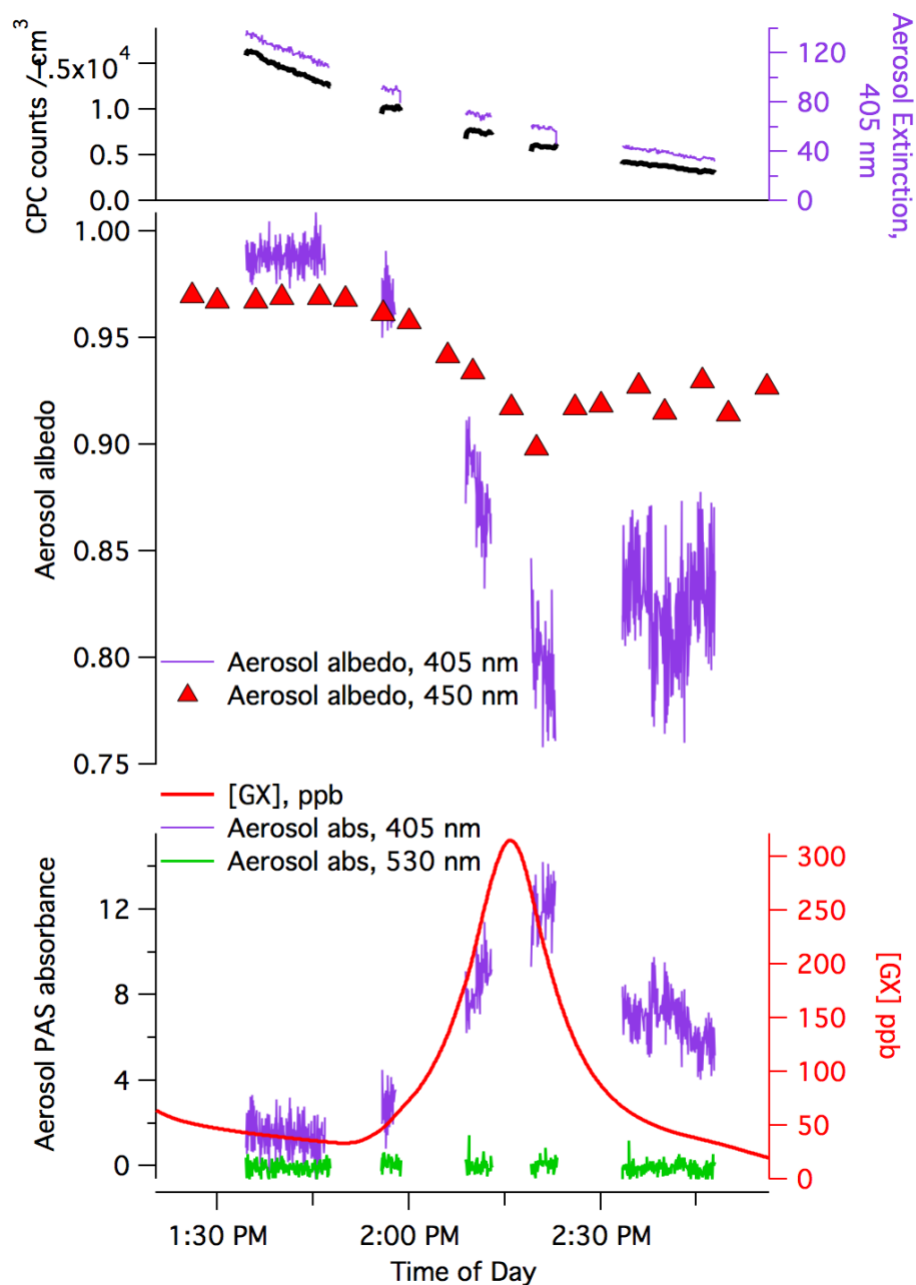

**Figure S6:** Gradual glyoxal addition experiment 4 on dry ammonium sulfate (AS) aerosol in small Tedlar chamber. Top: Aerosol CPC counts (black) and CRD extinction at 405 nm (blue). Middle: Aerosol albedo at 405 nm (purple line), calculated from PAS and CRD data, and aerosol albedo at 450 nm (red triangles) measured by CAPS-ssa. Bottom: Aerosol absorbance measured by PAS at 405 nm (blue) and 530 nm (green), and estimated glyoxal concentrations in the chamber (red, calculated using wall loss rate =  $2.7 \times 10^{-3} \text{ s}^{-1}$  onto cleaned Tedlar). Right axes are color-coded.

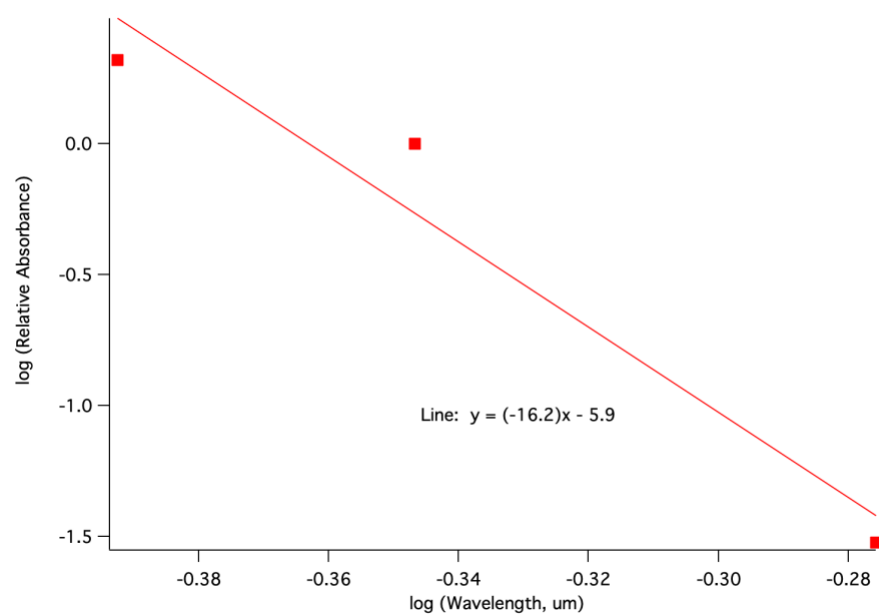

**Figure S7:** Calculation of angstrom absorption coefficient from normalized aerosol optical data recorded at 405, 450, and 530 nm at 2:20 pm in experiment 4 (300 ppb glyoxal + dry AS aerosol). Slope of line is Ångstrom absorption coefficient.

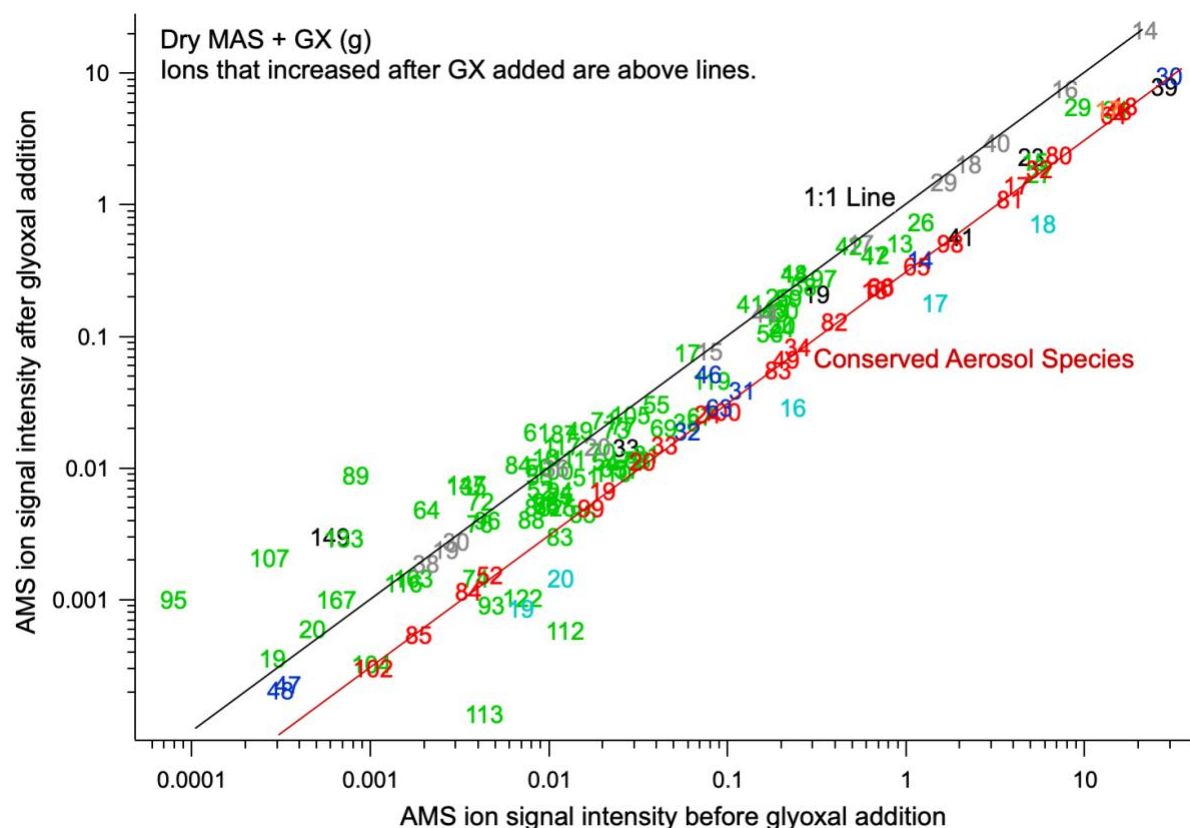

**Figure S8:** Experiment 8 AMS data summary: dry MeAm<sub>2</sub>SO<sub>4</sub> aerosol + 140 ppb glyoxal gas. Overall, aerosol concentrations decreased due to wall losses during the experiment, resulting in ions corresponding to conserved aerosol species falling on the red line with a slope of 1, slightly below the 1:1 line. However, certain ions increased upon GX addition and appear above the red line:  $m/z$  29 (GX fragment CHO), 26 (CN), 42 and 97 (dimethylimidazole), among many others, while water peaks decreased at  $m/z$  16, 17, and 18.

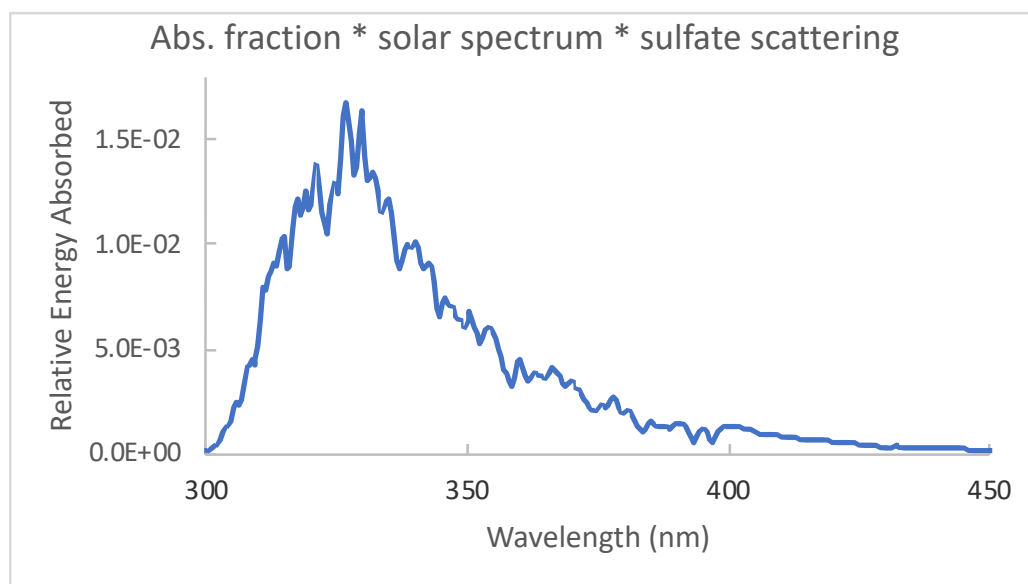

**Figure S9:** The relative energy absorbed by glyoxal + AS “dry” brown carbon is the calculated product of brown carbon absorbance fraction spectrum (using measured Ångstrom absorbance coefficient = -16), ASTM G173-03 standard solar spectrum, and the AS aerosol scattering function.<sup>1</sup> Approximately 97% of the energy absorbed by this brown carbon is in the UV range (< 400 nm).

## References

1. Nemesure, S.; Wagener, R.; Schwartz, S. E., Direct shortwave forcing of climate by the anthropogenic sulfate aerosol: Sensitivity to particle size, composition, and relative humidity. *Journal of Geophysical Research: Atmospheres* **1995**, *100*, (D12), 26105-26116. doi:10.1029/95JD02897
